# Supplementary material
Source: publisher figshare collection journal article supplement (https://gsapubs.figshare.com/ndownloader/files/23294147)
Supplement: Supplementary file 1 [file 23294147]

2012248

**SUPPLEMENTARY INFORMATION****1. LONG PROFILES OF MIOCENE-PLIOCENE CHANNELS**

Present-day slope of the base Ogallala Group (OG) and Remsburg Ranch Beds (RRB) were constructed using regional structure contour maps and geological mapping (Swinehart et al., 1985; Swinehart and Diffendal, 1997). Profiles are fit by a least squares regression using an exponential fit to scattered outcrop and well data. The Ogallala-age channels are constructed from superposition of channel positions upon the base-Ogallala structure contour map (Fig. FT1). Error on RRB profile (Fig. 3A) is minimal. The values of fitted parameters and statistical measures for the channels are shown in a Table DR1. North Platte River profile downloaded from <http://seamless.usgs.gov/>.

**2. GRAIN SIZE DATA COLLECTION**

Grain size data ( $D_{50}$ ) were collected by measuring the axes of 100 randomly-selected clasts ( $>2$  mm) in a  $1\text{ m}^2$  area. In situ Wolman point counts at each site were supplemented with a photographic version of the Wolman point count method to increase data collection efficiency. Time-averaged grain size measurements were determined by sampling two to three  $1\text{ m}^2$  grids within a  $10\text{ m}^2$  area (Duller et al., 2010; Whittaker et al., 2011) (Table DR2). AHF and OG data were compared to McMillan et al. (2002) (Fig. FT2). The error on individual point counts is negligible, but the error bars in Fig 2 represent the standard error associated with multiple median grain size values at-a-site.

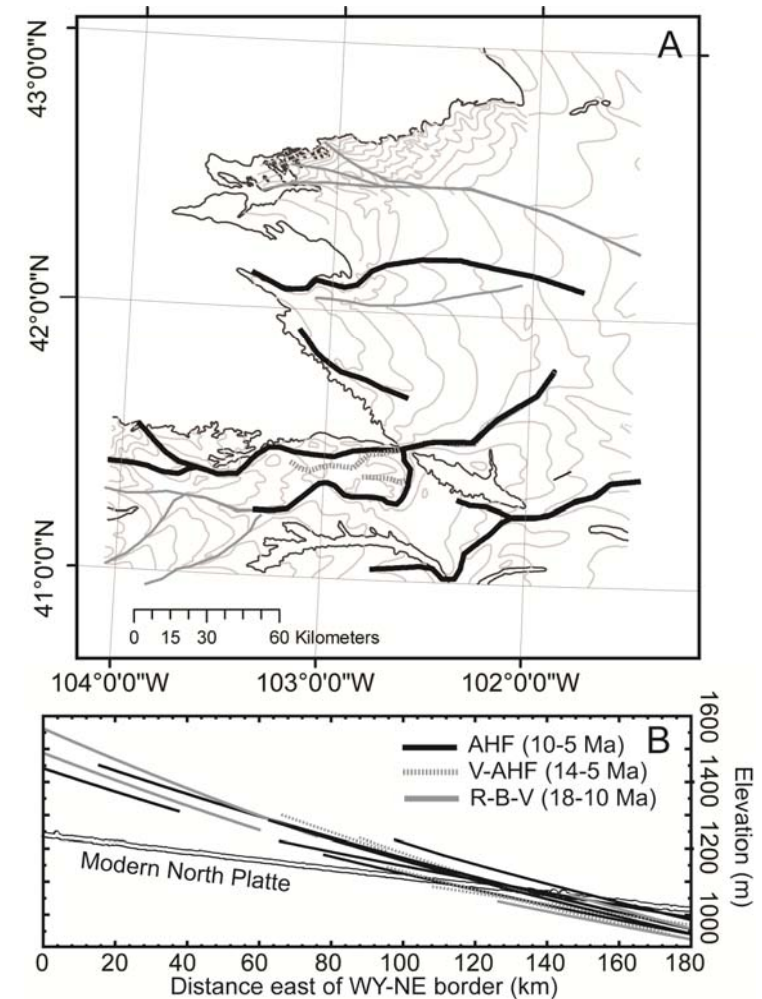

**Fig. FT1:** Map showing the position of base-Ogallala channels of different age in western Nebraska (A). The long profile of each of these channels is shown in (B) (R; Runningwater Formation, B; Box Butte Formation, V; Valentine Formation, AHF; Ash Hollow Formation).

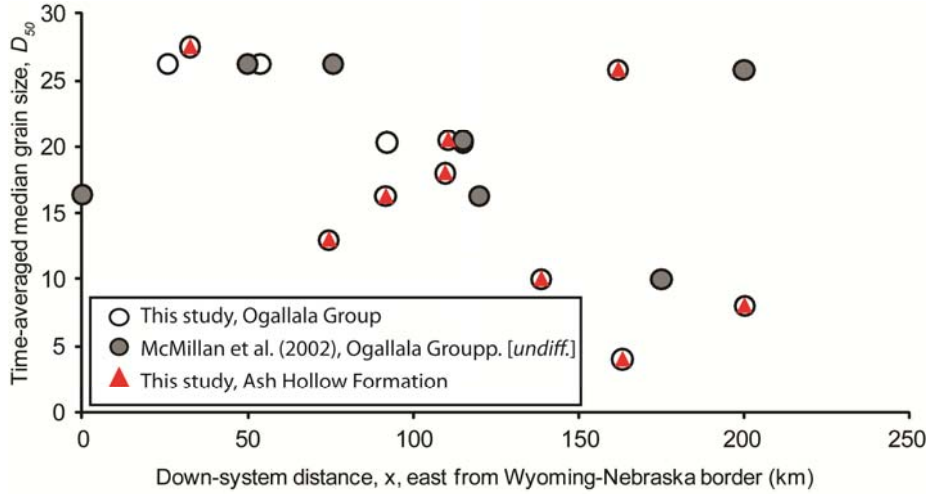

**Fig. FT2:**  $D_{50}$  against downsystem distance in the OG from the data used in the analysis of McMillan et al. (2002) (grey circles) and for this study (open circles). Red triangles show data points in the upper Miocene AHF. Grain size distributions for the AHF (10-6 Ma) are very similar to the data of McMillan et al. (2002) for the undifferentiated OG as a whole (20-6 Ma).

### 3. PALEODEPTHS

Paleodepth,  $H$ , for channels in the OG increase from ~1 to 2 m downsystem over the study area, as implied by McMillan et al. (2002). Heller et al. (2003) measure paleoflow depths from the AHF, and the undifferentiated Ogallala (Table DR3) to be  $1.4\text{m} \pm 0.5(1\sigma)$ .  $H$  estimates by previous workers (e.g. Skinner et al., 1977; Seni, 1980; Diffendal, 1982) and our own field observations agree with these measurements. However AHF channel depth does vary between sites. Conservative end-member solutions of  $H = 1$  m and  $H = 2$  m are used to constrain AHF paleoslope.  $H$  in the RRB is reliably constrained in the field from a site 100 km east of the Wyoming-Nebraska border where sedimentary structures suggest a time-averaged flow depth of  $1.9\text{ m} \pm 0.4 (1\sigma)$ . Paleodepths

near the Wyoming-Nebraska border are  $>1.5$  m. The downsystem evolution of depth is described as:

$$H = k_1 x^b + H_0 \quad (\text{S.1.}),$$

where  $k_1$  is a coefficient, and the exponent,  $b$ , is 0.4 for rivers displaying typical hydraulic scaling (Leopold et al., 1964).  $k_1$  is calibrated as  $\sim 0.02$  from field constraints on measured channel depths at a position 100 km east of the Wyoming Nebraska border (Table DR3).  $H_0$  represents the initial flow depth near the WY-NE border, which is  $\sim 1.75\text{ m} \pm 0.4(1\sigma)$ . End-member solutions of  $H = 1.5$  m and  $H = 2$  m are used to constrain RRB paleoslope.

### 4. PALEOSLOPE

Paleoslope is calculated from  $D_{50}$  and  $H$  measurements, following the Shields Stress inversion approach of Paola and Mohrig (1996) for gravel deposition under fully turbulent flow. The critical dimensionless shear stress to entrain sediment,  $\tau_c^*$ , (the Shields Stress) normalizes local bed shear stress by a function of the sediment density,  $\rho_s$  and the time-averaged median grain size,  $\langle D_{50} \rangle$ , given by:

$$\tau_c^* = \frac{\langle H \rangle S}{\rho_x \langle D_{50} \rangle} \quad (\text{S.2.}),$$

where  $S$  is the channel slope,  $\rho_x$  is the excess sediment density ( $\rho_s$ ) over water ( $\rho$ ), expressed as  $(\rho_s - \rho)/\rho$ .  $\tau_c^*$  is a constant, typically 0.045-0.06 (Paola and Mohrig, 1996, Mueller and Pitlick, 2005).  $S$  and  $D_{50}$  are typically configured such that the local shear stress is 1.2 - 1.4 times the critical shear stress to entrain sediment on the bed (Mueller and Pitlick, 2005). Paleoslope  $S_{(x)}$  is therefore calculated as:

$$S_{(x)} = \frac{C\rho_x < D_{50} >}{< H >} \quad (\text{S.3.}),$$

where  $C = 0.07$  (using  $\tau_c^* = 0.05$ ), consistent with previous workers (e.g. Paola and Mohrig, 1996; Mueller and Pitlick, 1995) and  $\rho_x \sim 1.6$ .

## 5. UNPAIRED, TWO-TAILED T-TEST OF SLOPES

Unpaired, two-tailed t-tests were used to investigate the likelihood that present-day slopes differ significantly from reconstructed paleoslopes. Specifically, we assess if: (1) the modern and reconstructed paleoslopes of the AHF are different by comparing 31 reconstructed paleoslope values (since  $H$ ,  $n = 31$ ) to a present-day individual lower limit ( $-1\sigma$ ) AHF slope value ( $n = 8$ ); (2) the modern and reconstructed paleoslope of the RRB are different by comparing 5 reconstructed paleoslope values (since  $H$ ,  $n = 5$ ), to the single present-day RRB slope value; (3) the present-day AHF channels ( $n = 8$ ) and the present-day older undifferentiated OG channels' ( $n = 8$ ) paleoslopes are. The results are: (1) the present-day base-AHF and the upper limit of the error associated with the reconstructed base-AHF paleoslopes are significantly different at the 99.95% confidence level (30 d.o.f); (2) The differences between the modern base of the RRB slope and paleoslope reconstructions are most likely (58% with 5 d.o.f) to have occurred purely by chance from the inherent variability in the data, which supports the hypothesis that they are the same; (3) The differences between the measured AHF and older OG paleochannel slopes are most likely (58% with 7 d.o.f) to have occurred purely by chance from the inherent variability in the data, which supports the hypothesis that they are the same.

## 6. PALEOHYDRAULIC ANALYSES

Downsystem discharge data are estimated using measurements of hydraulic radius,  $R$ , (e.g. in the RRB) and by channel slope and depth measurements assuming  $R \sim H$ . Average flow velocity,  $U$ , is approximated by the Manning's Equation:

$$U = \frac{1}{n} R^{2/3} S^{1/2} \quad (\text{S.4.}),$$

where  $n$  is the Manning's roughness coefficient ( $\sim 0.03$ ). Bank full discharge,  $Q$ , is given by:

$$Q = URW \quad (\text{S.5.}).$$

Discharge per unit width,  $q_w = Q/W$ , is expressed as:

$$q_w = \frac{1}{n} R^{5/3} S^{1/2} \quad (\text{S.6.}).$$

Complementary estimates of discharge are derived from  $D_{50}$  and slope data. Assuming  $R \sim H$ , rearranging Eq. (S.6.) to solve for depth, and substituting this into Eq. (S.2.) gives:

$$q_w = \left( \frac{\tau_c^* \rho_x < D_{50} >}{n^{3/5} S^{7/10}} \right)^{5/3} \quad (\text{S.7.}).$$

Specific stream power ( $\omega$ ) per unit area of the bed is given by:

$$\omega = \rho g q_w S \quad (\text{S.8.}).$$

## 7. ERRORS

The largest uncertainty in our calculations is paleodepth,  $H$ .  $H$  for AHF channels lies in the range 1-2 m. For the RRB, downsystem  $H$  is constrained by a numerical fit to calibrated value (see section 3). These uncertainties are used to define the error bars on data in Fig. 3A and Fig. 3B, and the top part of Fig. 4B. Uncertainty in the  $q_w$  calculation in the top panel of Fig. 4B (Eq. S.6) primarily depends on  $H$  but also the value of Manning's  $n$ . We use  $n = 0.03$  for consistency. The dependence of  $n$  on grain size (Parker, 1991) for RRB is  $n = 0.03 \pm 0.002(1\sigma)$  and for AHF is  $n = 0.025 \pm 0.002(1\sigma)$ . Our constant  $n$  assumption (0.03) underestimates  $q_w$  by 17% for the AHF, which is small relative to our uncertainty in  $H$ . For figure 4B (upper panel) a conservative error of  $\pm 50\%$  on  $q_w$  is implemented for the RRB and AHF, accounting for the  $1\sigma$  error on paleoflow depth. Uncertainty in the bottom panel of Fig. 4B, where  $q_w$  estimates are derived from  $S$  and grain size (Eq. S.7) include  $H$  (from which  $S$  comes),  $D_{50}$  (well-characterized) and  $n$ . We propagate these errors through to produce the bars in the bottom panel of Fig. 4B. We give  $\pm 100\%$  error on calculated  $q_w$  values for the AHF, and  $\pm 40\%$  for the RRB. Uncertainty on stream powers (Eq. S.8) comes from uncertainties in  $H$  (and hence  $S$ ) and  $D_{50}$  (Fig 4C). A 50% to 100% error is used for the RRB, dependant on the variability of  $D_{50}$  at a site. The stream power calculation for the AHF necessarily uses reconstructed paleoslope values twice, so data is displayed with generous error bars of  $\pm 200\%$ .

## 8. REFERENCES [not cited in the main article]

- Leopold, L., Wolman, G., and Miller, J., 1964, Fluvial processes in geomorphology. W.H. Freeman and Company, San Francisco.
- Mueller, E.R., Pitlick, J., and Nelson, J.M., 2005, Variation in the reference Shields Stress for bed load transport in gravel bed rivers and streams: Water Resources, Research, v.41, W04006.
- Parker, G., 1991, Selective sorting and abrasion of river gravel II: Applications: Journal of Hydraulic Engineering, v. 117, p. 150-171.
- Seni, S.J., 1980, Sand-body geometry and depositional systems, Ogallala Formation, Texas: University of Texas Bureau of Economic Geology Report of Investigations, v. 105, 36 p
- Skinner, M.F., Skinner, S.M., and Gooris, R.J., 1977, Stratigraphy and biostratigraphy of late Cenozoic deposits in central Sioux County, western Nebraska: American Museum of Natural History Bulletin, v. 158, 371 p. Portentous.
- Stanley, K.O. and Wayne, W.J., 1972, Epeirogenic and climatic controls of early sediment dispersal in Nebraska: Geological Society of America Bulletin, v. 83, p. 3675-3690.

# SUPPLEMENTARY DATA TABLES

TABLE DR1: EXPONENTIAL FITS TO BASE-UNIT PROFILES

| Profile <sup>1</sup> | Fitted equation <sup>2</sup> | <i>a</i> | <i>b</i>   | <i>R</i> <sup>2</sup> | Profile start<br>(km east of<br>WY-NE<br>border) | Profile end<br>(km east of<br>WY-NE<br>border) |
|----------------------|------------------------------|----------|------------|-----------------------|--------------------------------------------------|------------------------------------------------|
| RR                   | $y = ae^{-bx}$               | 1411     | 0.00000152 | 0.99                  | 0                                                | 180                                            |
| AH                   | $y = ae^{-bx}$               | 1515     | 0.00000264 | 0.98                  | 62                                               | 208                                            |
| AH                   | $y = ae^{-bx}$               | 1544     | 0.00000217 | 0.91                  | 82                                               | 137                                            |
| AH                   | $y = ae^{-bx}$               | 1518     | 0.00000257 | 0.97                  | 112                                              | 211                                            |
| AH                   | $y = ae^{-bx}$               | 1378     | 0.00000183 | 0.96                  | 65                                               | 230                                            |
| AH                   | $y = ae^{-bx}$               | 1653     | 0.00000303 | 0.92                  | 146                                              | 227                                            |
| AH                   | $y = ae^{-bx}$               | 1580     | 0.00000263 | 0.98                  | 110                                              | 240                                            |
| AH                   | $y = ae^{-bx}$               | 1441     | 0.00000250 | 0.76                  | 0                                                | 37                                             |
| R,V,B                | $y = ae^{-bx}$               | 1506     | 0.00000271 | 0.98                  | 65                                               | 227                                            |
| R,V,B                | $y = ae^{-bx}$               | 1470     | 0.00000256 | 0.96                  | 100                                              | 228                                            |
| R,V,B                | $y = ae^{-bx}$               | 1432     | 0.00000237 | 0.96                  | 115                                              | 232                                            |
| R,V,B                | $y = ae^{-bx}$               | 1488     | 0.00000283 | 0.95                  | 0                                                | 60                                             |
| R,V,B                | $y = ae^{-bx}$               | 1562     | 0.00000308 | 0.97                  | 0                                                | 76                                             |
| R,V,B                | $y = ae^{-bx}$               | 1606     | 0.00000337 | 0.92                  | 17                                               | 75                                             |
| R,V,B                | $y = ae^{-bx}$               | 1614     | 0.00000316 | 0.97                  | 87                                               | 174                                            |

<sup>1</sup>RR; Remsburg Ranch beds, AH; Ash Hollow Formation, R; Runningwater Formation, B; Box Butte Formation, V; Valentine Formation, AHF; Ash Hollow Formation

<sup>2</sup>Least squares regression to this an exponential fit was used to derive likely initial elevations at x = 0 (i.e. Wyoming-Nebraska border)

TABLE DR3: PALEO-FLOW DEPTHS FOR STUDY CHANNELS

| Unit            | H (m) | East of WY-NE<br>border (km) | Unit | H (m) | East of WY-NE<br>border (km) |
|-----------------|-------|------------------------------|------|-------|------------------------------|
| RR <sup>1</sup> | 1.5   | 10                           | OG   | 0.7   | 84                           |
| RR              | 1.6   | 10                           | OG   | 1.2   | 84                           |
| RR              | 2     | 100                          | OG   | 1     | 84                           |
| RR              | 1.8   | 100                          | OG   | 0.65  | 84                           |
| RR              | 2.2   | 100                          | OG   | 0.65  | 84                           |
| RR              | 1.5   | 100                          | OG   | 0.8   | 84                           |
| RR              | 2.5   | 100                          | OG   | 0.8   | 84                           |
| RR              | 1.5   | 100                          | OG   | 1.2   | 84                           |
|                 |       |                              | OG   | 1     | 84                           |
| OG <sup>2</sup> | 1.4   | 0                            | OG   | 1.2   | 84                           |
| OG              | 1.4   | 0                            | OG   | 0.8   | 84                           |
| OG              | 1.3   | 0                            | OG   | 0.8   | 84                           |
| OG              | 1.3   | 0                            | OG   | 1.6   | 105                          |
| OG              | 1.7   | 37                           | OG   | 1.6   | 105                          |
| OG              | 1.7   | 37                           | OG   | 1.5   | 105                          |
| OG              | 1.4   | 37                           | OG   | 1.5   | 105                          |
| OG              | 1.4   | 37                           | OG   | 1.2   | 142                          |
| OG              | 2.3   | 37                           | OG   | 1.2   | 142                          |
| OG              | 2.3   | 37                           | OG   | 0.8   | 142                          |
| OG              | 1.9   | 37                           | OG   | 2.7   | 170                          |
| OG              | 1.9   | 37                           | OG   | 2.05  | 170                          |
| OG              | 1.2   | 37                           | OG   | 1.8   | 170                          |
| OG              | 1.2   | 37                           | OG   | 3.2   | 170                          |

<sup>1</sup>RR; Remsburg Ranch beds

<sup>2</sup>OG; Ogallala Group. Including data from Heller et al. (2003)

TABLE DR2: GRAIN SIZE IN REMSBURG RANCH BEDS AND ASH HOLLOW FORMATION

| Unit <sup>1</sup> | X <sup>2</sup> | Y <sup>2</sup> | D <sub>50</sub> (mm) | D <sub>84</sub> (mm) | Method <sup>3</sup> | Distance E of WY-NE border (km) |
|-------------------|----------------|----------------|----------------------|----------------------|---------------------|---------------------------------|
| RR                | -104.203       | 42.10283       | 16                   | 27                   | Wolman              | -12724                          |
| RR                | -103.97        | 42.03033       | 23                   | 49                   | Wolman              | 7212                            |
| RR                | -103.718       | 42.01333       | 60                   | 112                  | Wolman              | 28576                           |
| RR                | -102.145       | 41.445         | 28                   | 52                   | Wolman              | 160439                          |
| RR                | -102.144       | 41.44583       | 33                   | 55                   | Wolman              | 160800                          |
| RR                | -102.676       | 41.56833       | 33.5                 | 52                   | Wolman              | 115194                          |
| RR                | -103.674       | 42.00361       | 52                   | 89                   | Wolman              | 31589                           |
| RR                | -102.488       | 41.47528       | 50                   | 80                   | Wolman              | 130800                          |
| RR                | -102.484       | 41.47667       | 34                   | 64                   | Wolman              | 131582                          |
| RR                | -102.106       | 41.25611       | 50                   | 75                   | Wolman              | 163062                          |
| RR                | -102.677       | 41.5475        | 55                   | 98                   | Wolman              | 116036                          |
| RR                | -104.709       | 42.19083       | 55                   | 88                   | Wolman              | -51426                          |
| RR                | -103.97        | 42.03033       | 30                   | 48                   | Photo               | 7212                            |
| RR                | -103.718       | 42.01333       | 47                   | 71                   | Photo               | 28576                           |
| RR                | -102.144       | 41.44583       | 18                   | 2                    | Photo               | 160800                          |
| RR                | -102.488       | 41.47528       | 21                   | 32                   | Photo               | 130800                          |
| RR                | -102.677       | 41.5475        | 26                   | 46                   | Photo               | 116036                          |
| RR                | -104.709       | 42.19083       | 19                   | 28                   | Photo               | -51426                          |
| RR                | -103.04        | 41.69406       | 37                   | 76                   | Wolman              | 84709                           |
| RR                | -103.605       | 41.97006       | 33                   | 59                   | Wolman              | 37264                           |
| RR                | -103.605       | 41.97047       | 31                   | 48                   | Wolman              | 37250                           |
| RR                | -103.605       | 41.97103       | 40                   | 60                   | Wolman              | 37080                           |
| RR                | -104.09        | 42.17678       | 69                   | 111                  | Wolman              | -3165                           |
| RR                | -102.744       | 41.5725        | 47                   | 86                   | Wolman              | 110350                          |
| RR                | -102.744       | 41.57278       | 41                   | 66                   | Wolman              | 110433                          |
| RR                | -102.734       | 41.57194       | 45                   | 81                   | Wolman              | 110082                          |
| RR                | -102.736       | 41.57333       | 62                   | 98                   | Wolman              | 110390                          |
| RR                | -103.04        | 41.69222       | 41                   | 71                   | Wolman              | 85000                           |
| RR                | -103.041       | 41.69583       | 60                   | 92                   | Wolman              | 84872                           |
| RR                | -103.606       | 41.97222       | 50                   | 80                   | Wolman              | 37261                           |
| RR                | -103.58        | 41.96389       | 36                   | 57                   | Wolman              | 39127                           |
| RR                | -103.589       | 41.96528       | 52                   | 91                   | Wolman              | 38708                           |
| RR                | -103.518       | 41.92528       | 52                   | 94                   | Wolman              | 44509                           |
| RR                | -103.877       | 42.08139       | 36                   | 61                   | Wolman              | 14676                           |
| RR                | -103.876       | 42.0825        | 65                   | 113                  | Wolman              | 14730                           |
| RR                | -103.877       | 42.07306       | 48                   | 84                   | Wolman              | 14676                           |
| RR                | -103.299       | 41.82944       | 40                   | 72                   | Wolman              | 63135                           |
| RR                | -103.299       | 41.82944       | 42                   | 63                   | Wolman              | 63150                           |
| RR                | -103.939       | 42.13139       | 37                   | 60                   | Wolman              | 9423                            |
| RR                | -103.939       | 42.13083       | 41                   | 64                   | Wolman              | 9361                            |
| RR                | -103.951       | 42.13778       | 45                   | 75                   | Wolman              | 8520                            |
| RR                | -103.949       | 42.13444       | 47                   | 81                   | Wolman              | 8690                            |
| RR                | -104.867       | 42.18889       | 48                   | 86                   | Wolman              | -67289                          |
| RR                | -104.852       | 42.1875        | 44                   | 64                   | Wolman              | -66186                          |
| RR                | -104.849       | 42.18528       | 85                   | 143                  | Wolman              | -65900                          |
| RR                | -104.089       | 42.17667       | 45                   | 74                   | Wolman              | -3038                           |
| RR                | -104.099       | 42.17778       | 65                   | 109                  | Wolman              | -3805                           |
| RR                | -104.107       | 42.18167       | 53                   | 85                   | Wolman              | -4400                           |
| RR                | -104.105       | 42.18139       | 58                   | 95                   | Wolman              | -4300                           |
| RR                | -103.605       | 41.97103       | 34                   | 57                   | Photo               | 37080                           |
| RR                | -104.09        | 42.17678       | 59                   | 81                   | Photo               | -3165                           |
| RR                | -102.744       | 41.5725        | 29                   | 48                   | Photo               | 110350                          |
| RR                | -102.734       | 41.57194       | 33                   | 48                   | Photo               | 110082                          |
| RR                | -102.736       | 41.57333       | 30                   | 46                   | Photo               | 110390                          |
| RR                | -103.04        | 41.69222       | 27                   | 41                   | Photo               | 85000                           |
| RR                | -103.041       | 41.69583       | 31                   | 45                   | Photo               | 84872                           |
| RR                | -103.606       | 41.97222       | 28                   | 48                   | Photo               | 37261                           |
| RR                | -103.58        | 41.96389       | 25                   | 37                   | Photo               | 39127                           |
| RR                | -103.589       | 41.96528       | 26                   | 53                   | Photo               | 38708                           |
| RR                | -103.877       | 42.08139       | 23                   | 36                   | Photo               | 14676                           |
| RR                | -103.877       | 42.07306       | 15                   | 24                   | Photo               | 14676                           |
| RR                | -103.299       | 41.82944       | 20                   | 29                   | Photo               | 63135                           |
| RR                | -103.939       | 42.13139       | 24                   | 34                   | Photo               | 9423                            |
| RR                | -103.951       | 42.13778       | 21                   | 34                   | Photo               | 8520                            |
| RR                | -103.949       | 42.13444       | 22                   | 34                   | Photo               | 8690                            |
| RR                | -104.867       | 42.18889       | 39                   | 67                   | Photo               | -67289                          |
| RR                | -104.864       | 42.19056       | 34                   | 59                   | Photo               | -67100                          |
| RR                | -104.099       | 42.17778       | 31                   | 46                   | Photo               | -3805                           |
| AH                | -103.679       | 42.12861       | 27                   | 42                   | Wolman              | 32500                           |
| AH                | -102.742       | 41.56083       | 18                   | 23                   | Wolman              | 109624                          |
| AH                | -102.129       | 41.29352       | 25                   | 41                   | Wolman              | 162000                          |
| AH                | -102.393       | 41.36407       | 10                   | 15                   | Wolman              | 138700                          |
| AH                | -102.957       | 41.45648       | 16                   | 28                   | Wolman              | 91700                           |
| AH                | -103.744       | 41.51875       | 26                   | 45                   | Wolman              | 25845                           |
| AH                | -103.413       | 41.49359       | 26                   | 41                   | Wolman              | 53800                           |
| AH                | -102.741       | 41.58466       | 20                   | 34                   | Wolman              | 110531                          |
| AH                | -101.668       | 41.20425       | 8                    | 12                   | Photo               | 200149                          |
| AH                | -102.114       | 41.29156       | 4                    | 7                    | Photo               | 163277                          |
| AH                | -103.154       | 41.50531       | 7                    | 12                   | Photo               | 75400                           |
| AH                | -103.168       | 41.50656       | 13                   | 20                   | Photo               | 74500                           |

<sup>1</sup>RR; Remsburg Ranch beds, AH; Ash Hollow Formation<sup>2</sup>XY co-ordinates in longitude/latitude space<sup>3</sup>Wolman data are field counts of > 100 clasts, repeated several times at each field site. Photo data are measurements of sediment caliber derived from clast point counts on scaled grain size photos of field exposures, repeated several times at each field site.
